# Supplementary material for: Adverse event rates associated with oral anticoagulant treatment early versus later after hospital discharge in older adults: a retrospective population-based cohort study
Source: PubMed Central journal article supplement — CMAJ Open. 2021 Apr 16;9(2):E364–75. doi: 10.9778/cmajo.20200138 (PMC8084547; doi:10.9778/cmajo.20200138), 2021-04-16
Supplement: supp_9.2.E364_2020-0138-original-submission.pdf [file supp_9.2.E364_2020-0138-original-submission.pdf]

## Oral Anticoagulant-associated Adverse Event Rates are High in the Post-Hospital Discharge Period

*Anne Holbrook, MD, PharmD, MSc, FRCPC<sup>1,2</sup>; Harsukh Benipal, MSc, BHSc<sup>2</sup>, J. Michael Paterson, MSc<sup>3,4</sup>, Diana Martins, MSc<sup>6</sup>, Simon Greaves, MSc<sup>3</sup>, Munil Lee, BHSc<sup>5</sup>, Tara Gomes, PhD, MHSc<sup>3,6</sup>*

<sup>1</sup>Division of Clinical Pharmacology & Toxicology, Department of Medicine, McMaster University, Hamilton, ON; <sup>2</sup>Department of Health Research Methods, Evidence and Impact, McMaster University, Hamilton, ON; <sup>3</sup>ICES, Toronto, Ontario, Canada; <sup>4</sup>Institute of Health Policy, Management and Evaluation, University of Toronto, Toronto, Ontario, Canada; <sup>5</sup>Schulich School of Medicine & Dentistry, Western University, London, ON; <sup>6</sup>Li Ka Shing Knowledge Institute, St Michael's Hospital, Toronto, Ontario, Canada

**Corresponding author:** Dr Anne Holbrook ([holbrook@mcmaster.ca](mailto:holbrook@mcmaster.ca))

### Funding Statement

This study was funded by grants to Dr Holbrook from the Hamilton Academic Health Sciences Organization AFP innovation fund (#HAH-16-06) and from the Canadian Institutes for Health Research (#365834), and by the Ontario Drug Policy Research Network (ODPRN), which is funded by grants from the Ontario Ministry of Health (MOH).

### Declaration of Authors Competing Interests

Anne Holbrook has served as an expert policy advisor for national, provincial and local hospital public drug plans for several decades. All other authors report no relevant competing interests.

## Oral Anticoagulant-associated Adverse Event Rates are High in the Post-Hospital Discharge Period

*Anne Holbrook, MD, PharmD, MSc, FRCP(C)<sup>1,2</sup>; Harsukh Benipal, MSc, BHSc<sup>2</sup>, J. Michael Paterson, MSc<sup>3,4</sup>, Diana Martins, MSc<sup>6</sup>, Simon Greaves, MSc<sup>3</sup>, Munil Lee, BHSc<sup>5</sup>, Tara Gomes, PhD, MHSc<sup>3,6,7</sup>*

<sup>1</sup>Division of Clinical Pharmacology & Toxicology, Department of Medicine, McMaster University, Hamilton, ON; <sup>2</sup>Department of Health Research Methods, Evidence and Impact, McMaster University, Hamilton, ON; <sup>3</sup>ICES, Toronto, Ontario, Canada; <sup>4</sup>Institute of Health Policy, Management and Evaluation, University of Toronto, Toronto, Ontario, Canada; <sup>5</sup>Schulich School of Medicine & Dentistry, Western University, London, ON; <sup>6</sup>Li Ka Shing Knowledge Institute, St Michael's Hospital, Toronto, Ontario, Canada; <sup>7</sup>Leslie Dan Faculty of Pharmacy, University of Toronto, Toronto, Ontario, Canada.

### **Abstract**

#### **Background**

Oral anticoagulants (OACs) are commonly used and are a top medication safety priority. Transitions in care, particularly for older adults taking multiple medications, have been recognized as patient safety risks. Our objective was to measure the rates of hemorrhage and thromboembolic events amongst senior OAC users early post-hospital discharge compared to later.

#### **Methods**

This was a population-based retrospective cohort study among Ontario residents, aged 66 years and older, who started, continued or resumed OAC therapy after hospital discharge between 2010 and 2015. Patient-level administrative healthcare data were linked, including prescription drug claims, vital status, demographics, and hospitalizations. We calculated the hemorrhage and thromboembolic rates over a one-year follow-up period, stratified by the first 30 days post-discharge and the remainder of the year. We examined the influence of patient sex, prevalent versus incident use, or switching OAC on the event rate.

#### **Results**

123,139 patients were included in the study, median age 78 years, 55.6% female, 26.4% with Charlson comorbidity score > 2. The rate of hemorrhage was highest during the first 30-days post discharge at 25.8 per 100 person-years (95% CI 24.8-26.8), falling to 15.7% (95% CI 15.3-16.1) during the remainder of the year. The risk of thromboembolic events per 100 person-years was 19.3 (95% CI 18.4-20.2) during the first 30-days post-discharge versus 6.9 (95% CI 6.6 – 7.1) during the remaining 11 months. Males had higher rates of events than females.

#### **Interpretation**

The first month following hospital discharge identifies a very high-risk period for OAC-related adverse events amongst older adults.

Word count (abstract): 256

Word count (body): 2496

## Introduction

### Background

Oral anticoagulants (OACs), including warfarin and the direct-acting oral anticoagulants (DOACs), are highly effective for the prevention of stroke and systemic embolism in patients with atrial fibrillation, as well as for the treatment and prevention of venous thromboembolism (VTE).<sup>(1-5)</sup> More than 7 million prescriptions in Canada and more than 37 million prescriptions in the United States are filled annually for OACs.<sup>(6, 7)</sup> Despite their benefit, oral anticoagulants (OACs) are considered high alert medications because of their risk of significant harm - mainly bleeding, or thromboembolic events and death if they are not well managed.<sup>(8)</sup> We and others have found that OACs are the most common drug-related cause of emergency department visits or hospitalizations amongst older adults, with accompanying high mortality rates.<sup>(9-11)</sup>

The immediate post-hospitalization period can be high risk for adverse events as the transition to home is a complex process involving multiple providers, locations, testing, medication changes with imperfect reconciliation, at a time when patients are still recovering. Approximately one fifth of Medicare patients discharged from hospital require a re-hospitalization within 30 days.<sup>(12)</sup> Studies on the rates of medication-related adverse events in the early post-hospitalization period suggest these are high.<sup>(13, 14)</sup> Our previous study demonstrated a four-fold greater bleeding risk in Ontario seniors on warfarin in the first 30 days after hospital discharge compared to the remainder of the 5-year follow-up.<sup>(15)</sup> Very little is known about the high-risk periods for bleeding or thromboembolic events in the era of DOAC use.

### Objectives

We aimed to measure thromboembolic and bleeding event rates associated with OAC use in the early post-hospital discharge period (within 30 days) compared to the remainder of the year, hypothesizing that the early post-discharge period would be higher risk for adverse events compared to later.

### Methods

#### Study Design and Setting

A retrospective, population-based cohort study was conducted in Ontario, Canada. All residents have access to publicly funded physician and hospital care, and seniors also have access to prescription medications with a low or no co-pay. Study methods and reporting follow STROBE and RECORD-PE recommendations.<sup>(16, 17)</sup> A detailed protocol with a pre-specified analysis plan was prepared and registered at ICES prior to accessing data.

#### Ethics

The use of data in this project was authorized under section 45 of Ontario's Personal Health Information Protection Act, which does not require review by a Research Ethics Board.

#### Data Sources

1  
2  
3 Multiple administrative health datasets were linked for this study, using unique, encoded  
4 identifiers. Details of the databases and their contents is provided in Table 1.<sup>(18)</sup> In brief, the  
5 Ontario Health Insurance Plan (OHIP) database contains billing and diagnostic codes for physician  
6 services, the Ontario Drug Benefit (ODB) database contains details of outpatient prescription drugs  
7 dispensed to seniors, and the Canadian Institute for Health Information Discharge Abstract  
8 Database (CIHI-DAD) and National Ambulatory Care Reporting System (CIHI-NACRS) detail  
9 diagnoses and procedures provided during hospital admissions and emergency department (ED)  
10 visits, respectively. Demographics and vital status were obtained from the OHIP Registered  
11 Persons Database. Disease-based registries were used for cancer, diabetes, congestive heart failure,  
12 and hypertension.<sup>(19-22)</sup> Physician specialities were identified from the ICES Physician Database.  
13 There is a large published experience on the validity and completeness of these population-based  
14 databases for drug-related adverse events requiring hospitalization or ED visits.<sup>(23)</sup> In this study,  
15 all diagnoses were coded in ICD-9 or ICD-10, procedures used the Canadian Classification of  
16 Interventions codes, and medications were identified through Health Canada Drug Identification  
17 Numbers. A list of codes used in the study is available upon request.  
18  
19  
20

### 21 Participants

22 Eligible patients were 66 years of age or older who started, continued or resumed OAC therapy  
23 after hospital discharge between September 2010 and March 2015. OACs included warfarin,  
24 dabigatran, rivaroxaban, and apixaban. Patients who had been admitted for a major bleed were  
25 excluded, as OAC therapy would be contraindicated in many cases. Patients were also excluded if  
26 they received more than one type of OAC at cohort entry or did not have provincial health  
27 coverage. Patients during their first year of eligibility for prescription drug coverage at 65 years  
28 were excluded to avoid incomplete medication records. Figure 1 shows the details on cohort  
29 selection.  
30  
31

### 32 OAC Exposure

33 We defined cohort entry as the dispensing date of the first post-discharge outpatient OAC  
34 prescription in the ODB database within one day of discharge. This was captured on the day prior  
35 to, day of, or day after the hospital discharge date. Ongoing use of OAC therapy was defined by  
36 successive refills of any OAC prescription within 30 days or 1.5 times the days' supply of the most  
37 recent prescription, whichever was greater. This period allowed for periodic adjustments to doses,  
38 short pauses, and variable timing of refills. If this timeframe for refills was exceeded, patients were  
39 deemed to have discontinued treatment and were followed for 30 days or 1.5 times the days' supply  
40 of their final prescription, whichever was longer.  
41  
42  
43

44 We stratified eligible patients into incident and prevalent OAC users. Incident users were  
45 individuals who had not previously been dispensed an OAC in the one year prior to cohort entry,  
46 whereas prevalent users were individuals who had been dispensed an OAC in that time. Prevalent  
47 users were further divided into two groups: switchers and non-switchers. Non-switchers continued  
48 the same OAC after discharge as they had been taking before hospitalization, while switchers  
49 changed to a different OAC prescription after hospital discharge.  
50  
51

### 52 Outcomes

53 Our primary outcomes were thromboembolic and hemorrhagic events requiring admission to  
54 hospital or visit to the emergency department. Thromboembolic events included venous events -  
55  
56  
57

1  
2  
3 deep vein thrombosis or pulmonary embolism, and arterial events - ischemic stroke or transient  
4 ischemic attack, peripheral vascular disease embolism, and systemic embolism. Hemorrhages  
5 were categorized as intracranial, upper or lower gastrointestinal, or other major bleeds. Multiple  
6 studies have established the validity of administrative data for thromboembolic events and  
7 hemorrhages.<sup>(24-30)</sup>  
8  
9

10 Patients were followed until one of the following events occurred: death, OAC therapy  
11 discontinuation, hospitalization for more than 5 days for reasons other than hemorrhage or  
12 thromboembolic event, 365 days of follow-up, or the end of the study period (March 31, 2016). If  
13 a patient had multiple admissions for any outcome of interest during follow-up, each event was  
14 included in calculating the rate of events. Major hemorrhagic and thromboembolic events during  
15 the post-discharge period were assessed at intervals of 0 to 30 days, 31 to 364 days, and 0 to 364  
16 days.  
17  
18

19 Figure 2 shows the cohort timeline and definitions.  
20

### 21 Variables

22 Baseline demographics included age, sex, and rural residence (based on postal codes). Data  
23 regarding the patients' care included the OAC dispensed at index prescription date, and physician  
24 specialty on the index prescription. One or more indication for each patient's OAC included: a)  
25 atrial fibrillation (ED visit or hospitalization for atrial fibrillation within the past 10 years), b)  
26 prevention of VTE (hip or knee joint replacement in the 35 days prior to cohort entry, or major  
27 surgery during index hospitalization), c) treatment of VTE (diagnosis of acute deep vein  
28 thrombosis or pulmonary embolism during the index hospitalization) or d) active cancer (codes  
29 for cancer-related surgery, chemotherapy or radiation in the Ontario Cancer Registry, DAD, or  
30 OHIP in the 180 days prior to cohort entry).  
31  
32  
33

34 Other past medical history collected at baseline included thromboembolic and hemorrhagic  
35 events within the previous 3 years, hospitalizations in the past year, recent medications that could  
36 adversely interact with OACs, and comorbidity burden using the Deyo-Charlson Comorbidity  
37 Index.<sup>(31)</sup> Individual risks of stroke using CHADS-VASc score and risks of major bleeding using  
38 HAS-BED score (HAS-BLED without INR data), were calculated using previously validated  
39 database registries.<sup>(19, 32-35)</sup>  
40  
41  
42

### 43 Statistical Analysis

44 We compared baseline characteristics between incident and prevalent users of OACs, and within  
45 the prevalent users, those who switched their OAC at the index prescription compared to pre-  
46 hospital period and those who did not switch.  
47

48 Crude rates for hemorrhagic and thromboembolic events were calculated during the first 30 days,  
49 31-364 days, and the entire year after initiating OAC therapy. Intention-to-treat principles were  
50 used for the analysis. The rate was calculated as the total number of events leading to the  
51 hospitalization or an emergency department visit for a hemorrhagic or thromboembolic event  
52 divided by the person-years available during the interval. The analysis was stratified to the type of  
53 OAC therapy user (incident, switcher or non-switcher).  
54  
55  
56  
57  
58  
59  
60

## Results

### Participants

Data for 3,036,285 patients who were discharged from an Ontario hospital during the accrual period, were assessed for eligibility. Once exclusions were made for missing identifiers, younger age, no OAC prescription within one day of hospitalization, death prior to cohort entry, and duplicate prescription for OAC, a total of 123,139 eligible patients were identified. Figure 1 details the flow chart for exclusions.

Table 2 shows the baseline characteristics of the cohort and strata.<sup>(36)</sup> The mean age of participants was 78 years (standardized difference [SD], 7.73), with 55.6% females, and 16.2% residing in a rural area. Indications for the OAC included atrial fibrillation (51.1%), recent joint replacement (36.0%), major surgery during index hospitalization (17.9%), active cancer (6.4%), and DVT or PE diagnosed during index hospitalization (5.2%). Patients were most often dispensed warfarin (48.1%) or rivaroxaban (41.7%), compared to dabigatran (5.4%) and apixaban (4.8%). Overall, 70,140 (57.0%) patients were incident users and 52,999 (43.0%) were prevalent users. Prevalent users tended to be older (mean age of  $81.1 \pm 7.6$  versus  $76.1 \pm 7.1$ ) and received their index prescriptions from family physicians more often than incident users (54.6% versus 18.0%).

Of the 52,999 prevalent users, 49,325 were non-switchers (93.1%) and 3,674 were switchers (6.9%). Of these, switches from DOAC to warfarin occurred in 40.3% of switchers and warfarin to DOAC in 59.7% of switchers. There were 9784 deaths over the year of follow-up, representing 7.9% of the cohort.

### Main Results

Rates of major hemorrhage (Table 3a and Figure 3) declined from 25.8 per 100 person-years (PY) (95% CI 24.8-26.8) in the first 30 days post-discharge to 15.7 per 100 person-years (95% CI 15.3-16.1) over the remaining 11 months. Prevalent users, with similar rates for switchers and non-switchers, experienced a higher overall rate of hemorrhage at 20.4 per 100 PY (95% CI 19.9-20.9) compared to incident users at 14.6 per 100PY (95% CI 14.1-15.1). In addition, males were more likely to experience a hemorrhage compared to females at 21.3 (95% CI 20.8-22.0) versus 14.8 (95% 14.4-15.3) PY respectively, over the year. Upper gastrointestinal bleeds were the most common type of specified bleed with an annual rate at 4.8 per 100 PY (95% CI 4.6-5.0).

Thromboembolic events, (Table 3b and Figure 4) occurred at a rate of rate was 19.3 per 100 PY (95% CI 18.4-20.2) in the first 30 days, decreasing to 6.9 per 100 PY (95% CI 6.6-7.1) over the remainder of the year. A total of 2485 of 4643 (53.5%) events over the year were arterial, including 1696 (36.5%) ischemic strokes/TIA or systemic embolisms, compared to 1180 (25.4%) DVT and 978 (21.1%) PE, representing venous events. The rate of thromboembolic events for incident users at 10.0 per 100 PY (95% CI 9.6-10.4) was higher than for prevalent users at 8.9 per 100 PY (95% CI 8.5-9.2). In contrast to patients with hemorrhagic events, patients with thromboembolic events were much more likely to have just switched their OAC, at 91.3% of prevalent users. Males had a higher rate of thromboembolic events compared to females at 10.0 per 100 (95% 9.6-10.5) versus 8.9 per 100 PY (95% CI 8.5-9.2) respectively.

## Interpretation

### Key Results

This study is unique in its focus on oral anticoagulant-related adverse events early versus later following hospital discharge. Assuming a medication-focused approach to outcomes as opposed to a disease-specific approach, provides a broader view of medication safety. In this case, both major hemorrhages and thromboembolic events were defined to be highly clinically relevant in that hospitalization or ED visit was required. In this population-based cohort study involving older Ontarians, hemorrhages and thromboembolic event rates were very high in the first 30 days after hospital discharge, considerably higher than the remainder of the year. Although incident users included a large number of short-term users (e.g., VTE prophylaxis after orthopedic surgery), their 30-day event rates were still high, at 21.4 per 100 PY (95% CI 20.2-22.6) for thromboembolic events and 21.9 per 100 PY (95% CI 20.6-23.1) for hemorrhagic events. Prevalent users of OACs were more likely than incident users to experience a hemorrhagic event at any time point, but less likely to suffer a thromboembolic event. Event rates at every point except later thromboembolic events, were significantly higher in males than females. Switching between OAC agents was not found to elevate the risk of adverse events. The mortality rate in our cohort was also relatively high at 7.9% during the year of follow-up.

The main results are in line with observational studies reporting a high prevalence of OAC-related adverse drug events leading to emergency room visits and hospitalization of patients, and support the contention that transitions in care for patients should be a target for research on interventions intended to lower adverse outcomes.<sup>(37,38)</sup> A recent systematic review reported that frequent patient contact, dedicated teams for discharge planning and home visits were found to be most effective at reducing early readmissions.<sup>(39)</sup> In the Canadian context, a large cohort study found that 30-day non-elective readmissions and deaths could be reduced with physician follow-up, particularly by the physician involved in the patient's hospital care.<sup>(40)</sup> Randomized trials of targeted strategies to reduce readmission in patients discharged with OACs are still needed and are high-priority.

Sex differences in the rates of venous thromboembolic events have been previously reported, although the reasons for higher rates in males are not entirely clear.<sup>(41-45)</sup> Stroke rates in patients with atrial fibrillation may not vary by sex.<sup>(46)</sup> Bleeding rates for men on oral anticoagulants, either DOACs or warfarin, have also been reported to be higher than in women<sup>(45, 47)</sup> but refuted by others, so sex differences in hemorrhage rates on OACs are also unclear.

### Limitations

Our study has several strengths, including large sample size, validated data sources, and inclusion of virtually all seniors in a large, diverse province of Canada.<sup>(48)</sup> However, there are limitations. First, the results cannot be generalized to younger groups of people. Second, minor events which do not lead to hospitalization or ED visits can still be morbid and adversely affect quality of life, but are not captured in these data. Third, these observational data which are collected as part of routine clinical care are always at some risk of information bias. However, missing data was very rare at less than 0.07% and misclassification bias for key elements including hospital discharge, prescription dispensing, and morbid outcomes requiring hospitalization or ED visit, is known to

1  
2  
3 be low.(49-51) A follow-up study on predictors of the outcome events, will address unmeasured  
4 confounding and death as a competing risk of outcomes, in more detail.  
5  
6

### 7 Conclusion

8 This study shows that post-hospital discharge adverse events related to OACs are common  
9 amongst older adults in Ontario, and are very common in the first 30 days post-discharge. This  
10 supports the need for trials of organized discharge and early post-discharge interventions as well  
11 as further analyses of predictors of adverse events.  
12  
13

### 14 Funding

15 This study was funded by grants to Dr Holbrook from the Hamilton Academic Health Sciences  
16 Organization AFP innovation fund (#HAH-16-06) and from the Canadian Institutes for Health  
17 Research (#365834), and by the Ontario Drug Policy Research Network (ODPRN), which is  
18 funded by grants from the Ontario Ministry of Health (MOH).  
19  
20  
21

### 22 Acknowledgements

23 This study was supported by ICES, which is funded by an annual grant from the Ontario MOH.  
24 Parts of this material are based on data and information compiled and provided by the Ontario  
25 Ministry of Health, the Canadian Institute for Health Information, Cancer Care Ontario, and  
26 Brogan Canada Inc. The analyses, conclusions, opinions and statements expressed herein are those  
27 of the authors and do not reflect those of the funding or data sources; no endorsement is intended  
28 or should be inferred.  
29  
30  
31

### 32 Accessibility of protocol, raw data, and programming code

33 The dataset from this study is held securely in coded form at ICES. While data sharing agreements  
34 prohibit ICES from making the dataset publicly available, access may be granted to those who  
35 meet pre-specified criteria for confidential access, available at [www.ices.on.ca/DAS](http://www.ices.on.ca/DAS). The full  
36 dataset creation plan and underlying analytic code are available from the authors upon request,  
37 understanding that the computer programs may rely upon coding templates or macros that are  
38 unique to ICES and are therefore either inaccessible or may require modification.  
39  
40

41 This study included several ICES scientist investigators and analysts who have full access to both  
42 the underlying source data files and the final analytic data set. Standard data cleaning methods  
43 were used.  
44  
45  
46  
47  
48  
49  
50  
51  
52  
53  
54  
55  
56  
57  
58  
59  
60



Table 1: Description of ICES Databases<sup>(18)</sup>

| <b>Name of Database</b>                                                          | <b>Content of Database</b>                                                                                                                                                                                                                                            |
|----------------------------------------------------------------------------------|-----------------------------------------------------------------------------------------------------------------------------------------------------------------------------------------------------------------------------------------------------------------------|
| Canadian Institute for Health Information–Discharge Abstract Database (CIHI-DAD) | Patient-level demographic, diagnostic, procedural and treatment information on all acute care hospitalizations                                                                                                                                                        |
| CIHI—National Ambulatory Care Reporting System (CIHI-NACRS)                      | Patient-level demographic, diagnostic, procedural and treatment information for all Emergency Department visits                                                                                                                                                       |
| The DrugList File                                                                | List of Drug Identification Numbers used in Canada from 1990 forward. Contains drug and product names, manufacturer, subclass information, pharmacy classification group codes, drug strength, route of administration, and first and last dispensing dates of drugs. |
| ICES-Derived Cohorts                                                             | Validated cohorts of individuals with specific diseases and conditions, including the Ontario Congestive Heart Failure (CHF) Database; Ontario Diabetes Database (ODD); Ontario Hypertension Dataset (HYPER)                                                          |
| ICES Physician Database (IPDB)                                                   | Characteristics of physicians and surgeons licenced to practice in Ontario                                                                                                                                                                                            |
| Ontario Cancer Registry (OCR)                                                    | Patient-level demographic, cancer diagnosis and cancer-related mortality information                                                                                                                                                                                  |
| Ontario Drug Benefit (ODB)Program Database                                       | Records of dispensed outpatient prescriptions paid for by the provincial government                                                                                                                                                                                   |
| Ontario Health Insurance Plan(OHIP) Claims History Database                      | Claims for physician services paid for by the provincial government                                                                                                                                                                                                   |
| Ontario Health Insurance Plan (OHIP) Registered Persons Database (RPDB)          | Demographic, place of residence and vital status information for all persons eligible to receive insured health services in the province                                                                                                                              |
| Statistics Canada Census Postal Code Conversion File                             | Information on rural residence and income quintiles of residents                                                                                                                                                                                                      |

**Table 2: Baseline Characteristics\***

|                                         | Entire cohort                |                                     |                                      |      | Prevalent users                   |                                         |      |
|-----------------------------------------|------------------------------|-------------------------------------|--------------------------------------|------|-----------------------------------|-----------------------------------------|------|
|                                         | Entire cohort<br>n = 123,139 | Incident<br>OAC Users<br>n = 70,140 | Prevalent<br>OAC Users<br>n = 52,999 | SD§  | Prevalent<br>Switcher<br>n = 3674 | Prevalent<br>Non-switcher<br>n = 49,325 | SD§  |
| <b>Demographics</b>                     |                              |                                     |                                      |      |                                   |                                         |      |
| Age†                                    | 78.2 (7.7)                   | 76.1 (7.1)                          | 81.1 (7.6)                           | 0.69 | 79.4 (7.3)                        | 81.23 (7.6)                             | 0.24 |
| Age 66-74 years                         | 44,343 (36.0)                | 32,603 (46.5)                       | 11,740 (22.2)                        | 0.53 | 1,024 (27.9)                      | 10,716 (21.7)                           | 0.14 |
| Age >75 years                           | 78,796 (64.0)                | 37,537 (53.5)                       | 41,259 (77.8)                        | 0.53 | 2,650 (72.1)                      | 38,609 (78.3)                           | 0.14 |
| Female sex                              | 68,408 (55.6)                | 39,956 (57.0)                       | 28,452 (53.7)                        | 0.07 | 1,846 (50.2)                      | 26,606 (53.9)                           | 0.07 |
| <b>Rural Residence‡</b>                 |                              |                                     |                                      |      |                                   |                                         |      |
| No                                      | 103,141 (83.8)               | 58,203 (83.0)                       | 44,938 (84.8)                        | 0.05 | 3,090 (84.1)                      | 41,848 (84.8)                           | 0.02 |
| Yes                                     | 19,931 (16.2)                | 11,892 (17.0)                       | 8,039 (15.2)                         | 0.05 | 580 (15.8)                        | 7,459 (15.1)                            | 0.02 |
| <b>Oral Anticoagulant Dispensed</b>     |                              |                                     |                                      |      |                                   |                                         |      |
| Apixaban                                | 5,890 (4.8)                  | 2,810 (4.0)                         | 3,080 (5.8)                          | 0.08 | 570 (15.5)                        | 2,510 (5.1)                             | 0.35 |
| Dabigatran                              | 6,608 (5.4)                  | 2,775 (4.0)                         | 3,833 (7.2)                          | 0.14 | 473 (12.9)                        | 3,360 (6.8)                             | 0.20 |
| Rivaroxaban                             | 51,409 (41.7)                | 42,546 (60.7)                       | 8,863 (16.7)                         | 1.01 | 1,150 (31.3)                      | 7,713 (15.6)                            | 0.38 |
| Warfarin                                | 59,232 (48.1)                | 22,009 (31.4)                       | 37,223 (70.2)                        | 0.84 | 1,481 (40.3)                      | 35,742 (72.5)                           | 0.69 |
| <b>Indication</b>                       |                              |                                     |                                      |      |                                   |                                         |      |
| Atrial Fibrillation within 10 yr        | 62,957 (51.1)                | 22,530 (32.1)                       | 40,427 (76.3)                        | 0.99 | 2,988 (81.3)                      | 37,439 (75.9)                           | 0.13 |
| Joint replacement within 35 d           | 44,375 (36.0)                | 38,939 (55.5)                       | 5,436 (10.3)                         | 1.10 | 502 (13.7)                        | 4,934 (10.0)                            | 0.11 |
| Major surgery index hospitalization     | 22,043 (17.9)                | 17,384 (24.8)                       | 4,659 (8.8)                          | 0.44 | 590 (16.1)                        | 4,069 (8.2)                             | 0.24 |
| Active cancer within 180 d              | 7,858 (6.4)                  | 3,548 (5.1)                         | 4,310 (8.1)                          | 0.12 | 278 (7.6)                         | 4,032 (8.2)                             | 0.02 |
| DVT or PE index hospitalization         | 6,407 (5.2)                  | 1,783 (2.5)                         | 4,624 (8.7)                          | 0.27 | 349 (9.5)                         | 4,275 (8.7)                             | 0.03 |
| <b>Discharging Physician Specialty‡</b> |                              |                                     |                                      |      |                                   |                                         |      |
| Internal medicine                       | 18,490 (15.0)                | 8,231 (11.7)                        | 10,259 (19.4)                        | 0.21 | 628 (17.1)                        | 9,631 (19.5)                            | 0.06 |
| Hematologist                            | 1,029 (0.8)                  | 622 (0.9)                           | 407 (0.8)                            | 0.01 | 30 (0.8)                          | 377 (0.8)                               | 0.01 |
| Cardiologist                            | 13,137 (10.7)                | 6,856 (9.8)                         | 6,281 (11.9)                         | 0.07 | 679 (18.5)                        | 5,602 (11.4)                            | 0.20 |
| Orthopedic surgery                      | 31,935 (25.9)                | 27,860 (39.7)                       | 4,075 (7.7)                          | 0.81 | 319 (8.7)                         | 3,756 (7.6)                             | 0.04 |
| Family physician                        | 30,694 (24.9)                | 11,773 (16.8)                       | 18,921 (35.7)                        | 0.44 | 1,057 (28.8)                      | 17,864 (36.2)                           | 0.16 |
| Other                                   | 27,776 (22.6)                | 14,786 (21.1)                       | 12,990 (24.5)                        | 0.08 | 957 (26.0)                        | 12,033 (24.4)                           | 0.04 |
| <b>Prescribing Physician Specialty‡</b> |                              |                                     |                                      |      |                                   |                                         |      |
| Family Medicine                         | 41,524 (33.7)                | 12,604 (18.0)                       | 28,920 (54.6)                        | 0.82 | 1,274 (34.7)                      | 27,646 (56.0)                           | 0.44 |
| Orthopedic surgery                      | 31,394 (25.5)                | 28,014 (39.9)                       | 3,380 (6.4)                          | 0.87 | 287 (7.8)                         | 3,093 (6.3)                             | 0.06 |
| Internal Medicine                       | 9,958 (8.1)                  | 5,350 (7.6)                         | 4,608 (8.7)                          | 0.04 | 432 (11.8)                        | 4,176 (8.5)                             | 0.11 |
| Cardiologist                            | 7,083 (5.8)                  | 3,840 (5.5)                         | 3,243 (6.1)                          | 0.03 | 441 (12.0)                        | 2,802 (5.7)                             | 0.22 |
| Hematologist                            | 2,324 (1.9)                  | 1,808 (2.6)                         | 516 (1.0)                            | 0.12 | 107 (2.9)                         | 409 (0.8)                               | 0.15 |
| Other                                   | 8,792 (7.1)                  | 4,843 (6.9)                         | 3,949 (7.5)                          | 0.02 | 387 (10.5)                        | 3,562 (7.2)                             | 0.12 |
| Unknown                                 | 22,064 (17.9)                | 13,681 (19.5)                       | 8,383 (15.8)                         | 0.10 | 746 (20.3)                        | 7,637 (15.5)                            | 0.13 |
| <b>Past Medical History</b>             |                              |                                     |                                      |      |                                   |                                         |      |
| Hospitalizations within 1 yr†           | 0.67 ± 1.16                  | 0.30 ± 0.73                         | 1.16 ± 1.42                          | 0.76 | 0.99 ± 1.32                       | 1.17 ± 1.43                             | 0.13 |
| Thromboembolic events                   | 13,741 (11.2)                | 10,483 (19.8)                       | 3,258 (4.6)                          | 0.48 | 730 (19.9)                        | 9,753 (19.8)                            | 0.00 |

|                                             |                |               |               |      |              |               |      |
|---------------------------------------------|----------------|---------------|---------------|------|--------------|---------------|------|
| within 3 yr                                 |                |               |               |      |              |               |      |
| Ischemic stroke                             | 4,419 (3.6)    | 990 (1.4)     | 3,429 (6.5)   | 0.26 | 228 (6.2)    | 3,201 (6.5)   | 0.01 |
| Transient ischemic stroke                   | 2,757 (2.2)    | 853 (1.2)     | 1,904 (3.6)   | 0.16 | 142 (3.9)    | 1,762 (3.6)   | 0.02 |
| Peripheral vascular disease event           | 2,540 (2.1)    | 680 (1.0)     | 1,860 (3.5)   | 0.17 | 106 (2.9)    | 1,754 (3.6)   | 0.04 |
| Systemic embolism                           | 705 (0.6)      | 155 (0.2)     | 550 (1.0)     | 0.10 | 34 (0.9)     | 516 (1.0)     | 0.01 |
| PE                                          | 2,393 (1.9)    | 349 (0.5)     | 2,044 (3.9)   | 0.23 | 152 (4.1)    | 1,892 (3.8)   | 0.02 |
| DVT                                         | 3,280 (2.7)    | 580 (0.8)     | 2,700 (5.1)   | 0.25 | 204 (5.6)    | 2,496 (5.1)   | 0.02 |
| Hemorrhagic event within 3 yr               | 13,406 (10.9)  | 3,627 (5.2)   | 9,779 (18.5)  | 0.42 | 616 (16.8)   | 9,163 (18.6)  | 0.05 |
| Intracranial bleeding                       | 777 (0.6)      | 230 (0.3)     | 547 (1.0)     | 0.09 | 27 (0.7)     | 520 (1.1)     | 0.03 |
| Upper gastrointestinal bleeding             | 3,830 (3.1)    | 1,068 (1.5)   | 2,762 (5.2)   | 0.21 | 182 (5.0)    | 2,580 (5.2)   | 0.01 |
| Lower gastrointestinal bleeding             | 1,498 (1.2)    | 453 (0.6)     | 1,045 (2.0)   | 0.12 | 85 (2.3)     | 960 (1.9)     | 0.03 |
| Other major bleeds                          | 8,750 (7.1)    | 2,132 (3.0)   | 6,618 (12.5)  | 0.36 | 392 (10.7)   | 6,226 (12.6)  | 0.06 |
| <b>Comorbidities</b>                        |                |               |               |      |              |               |      |
| Congestive heart failure                    | 47,133 (38.3)  | 14,265 (20.3) | 32,868 (62.0) | 0.93 | 2,096 (57.0) | 30,772 (62.4) | 0.11 |
| Hypertension                                | 106,292 (86.3) | 57,447 (81.9) | 48,845 (92.2) | 0.31 | 3,378 (91.9) | 45,467 (92.2) | 0.01 |
| Diabetes                                    | 46,522 (37.8)  | 22,569 (32.2) | 23,953 (45.2) | 0.27 | 1,627 (44.3) | 22,326 (45.3) | 0.02 |
| Renal dysfunction <sup>□</sup>              | 11,216 (9.1)   | 2,491 (3.6)   | 8,725 (16.5)  | 0.44 | 418 (11.4)   | 8,307 (16.8)  | 0.16 |
| Liver dysfunction <sup>□</sup>              | 1,349 (1.1)    | 343 (0.5)     | 1,006 (1.9)   | 0.13 | 68 (1.9)     | 938 (1.9)     | 0.00 |
| Drug abuse                                  | 14,226 (11.6)  | 11,642 (16.6) | 2,584 (4.9)   | 0.39 | 202 (5.5)    | 2,382 (4.8)   | 0.03 |
| Alcohol abuse-past 3 yr                     | 1,401 (1.1)    | 517 (0.7)     | 884 (1.7)     | 0.09 | 64 (1.7)     | 820 (1.7)     | 0.01 |
| <b>Charlson Score</b>                       |                |               |               |      |              |               |      |
| 0                                           | 20,946 (17.0)  | 11,714 (16.7) | 9,232 (17.4)  | 0.02 | 669 (18.2)   | 8,563 (17.4)  | 0.02 |
| 1                                           | 14,766 (12.0)  | 6,041 (8.6)   | 8,725 (16.5)  | 0.24 | 637 (17.3)   | 8,088 (16.4)  | 0.03 |
| 2+                                          | 32,563 (26.4)  | 8,967 (12.8)  | 23,596 (44.5) | 0.75 | 1,355 (36.9) | 22,241 (45.1) | 0.17 |
| N/A (No hospitalization)                    | 54,864 (44.6)  | 43,418 (61.9) | 11,446 (21.6) | 0.90 | 1,013 (27.6) | 10,433 (21.2) | 0.15 |
| <b>CHADS2-VASC Score</b>                    |                |               |               |      |              |               |      |
| Mean ± SD <sup>†</sup>                      | 4.08 ± 1.59    | 3.49 ± 1.37   | 4.86 ± 1.53   | 0.95 | 4.77 ± 1.47  | 4.87 ± 1.53   | 0.07 |
| Median (IQR)                                | 4 (3-5)        | 3 (3-4)       | 5 (4-6)       | 0.98 | 5 (4-6)      | 5 (4-6)       | 0.07 |
| <b>HAS-B_ED Score</b>                       |                |               |               |      |              |               |      |
| Mean ± SD <sup>†</sup>                      | 2.20 ± 0.68    | 2.09 ± 0.63   | 2.36 ± 0.71   | 0.41 | 2.30 ± 0.69  | 2.37 ± 0.72   | 0.09 |
| Median (IQR)                                | 2 (2-3)        | 2 (2-2)       | 2 (2-3)       | 0.38 | 2 (2-3)      | 2 (2-3)       | 0.10 |
| <b>Concomitant Medications within 120 d</b> |                |               |               |      |              |               |      |
| NSAID                                       | 19,273 (15.7)  | 15,344 (21.9) | 3,929 (7.4)   | 0.42 | 304 (8.3)    | 3,625 (7.3)   | 0.03 |
| Aspirin                                     | 2,870 (2.3)    | 2,212 (3.2)   | 658 (1.2)     | 0.13 | 41 (1.1)     | 617 (1.3)     | 0.01 |
| Other Antiplatelet                          | 7,026 (5.7)    | 4,459 (6.4)   | 2,567 (4.8)   | 0.07 | 207 (5.6)    | 2,360 (4.8)   | 0.04 |
| Amiodarone                                  | 4,048 (3.3)    | 598 (0.9)     | 3,450 (6.5)   | 0.30 | 242 (6.6)    | 3,208 (6.5)   | 0.00 |
| SSRI                                        | 14,864 (12.1)  | 6,189 (8.8)   | 8,675 (16.4)  | 0.23 | 428 (11.6)   | 8,247 (16.7)  | 0.15 |
| Antibiotic within 30 d                      | 17,345 (14.1)  | 7,384 (10.5)  | 9,961 (18.8)  | 0.24 | 541 (14.7)   | 9,420 (19.1)  | 0.12 |

\* reported as number (%) unless otherwise indicated; § Standardized difference; † Mean (standard deviation); ‡ data missing for < 0.07%; IQR = interquartile range; DVT = deep vein thrombosis; PE = pulmonary embolism; NSAID = Nonsteroidal anti-inflammatory drug; SSRI = selective serotonin reuptake inhibitor; □ Abnormal renal function included ICD-10 codes for dialysis, chronic renal disease, renal cancer, renal surgery; Abnormal liver disease included ICD-10 codes for cirrhosis, chronic liver disease, liver cancer, hepatitis, liver surgery

**Table 3. Outcome Event Rates Over Time Post-hospital Discharge\***

| Hemorrhages           | N = 8767     | Event Rates      |                      |                  |
|-----------------------|--------------|------------------|----------------------|------------------|
|                       |              | Over 1 year      | First 30 Days        | After 30 Days    |
| Overall               |              | 17.7 [17.4,18.1] | 25.8 [24.8,26.8]     | 15.7 [15.3,16.1] |
| Intracranial bleed    | 664 (7.6)    | 1.3 [1.2,1.4]    | 1.2 [1.0,1.4]        | 1.4 [1.3,1.5]    |
| Upper GI bleed        | 2,392 (27.3) | 4.8 [4.6,5.0]    | 7.5 [7.0,8.0]        | 4.2 [4.0,4.4]    |
| Lower GI bleed        | 669 (7.6)    | 1.4 [1.3,1.5]    | 1.9 [1.6,2.2]        | 1.2 [1.1,1.3]    |
| Other major bleed     | 5,042 (57.5) | 10.2 [9.9,10.5]  | 15.3 [14.5,16.0]     | 8.9 [8.6,9.2]    |
| Incident Users        | 3,312 (37.8) | 14.6 [14.1,15.1] | 21.9 [20.7,23.1]     | 12.1 [11.6,12.7] |
| Prevalent Users       | 5,455 (62.2) | 20.4 [19.9,20.9] | 31.1 [29.4,32.8]     | 18.4 [17.8,18.9] |
| Non-switchers         | 5,044 (92.5) | 20.5 [19.9,21.0] | 31.2 [29.5,32.9]     | 18.4 [17.8,19.0] |
| Switchers             | 411 (7.5)    | 19.6 [17.7,21.5] | 29.5 [23.4,35.7]     | 18.0 [16.0,19.9] |
| Male                  | 4677 (53.3)  | 21.4 [20.8,22.0] | 32.1 [30.5,33.8]     | 18.7 [18.0,19.3] |
| Female                | 4090 (46.7)  | 14.8 [14.4,15.3] | 20.8 [19.6,22.0]     | 13.3 [12.9,13.8] |
| Thromboembolic Events | Number (%)   | Event Rates      |                      |                  |
|                       | N = 4643     | Over 1 year      | Within First 30 Days | After 30 Days    |
| Overall               |              | 9.4 [9.1,9.7]    | 19.3 [18.4,20.2]     | 6.9 [6.6,7.1]    |
| Ischemic Stroke       | 1,001 (21.6) | 2.0 [1.9,2.2]    | 2.8 [2.5,3.2]        | 1.8 [1.7,2.0]    |
| TIA                   | 542 (11.7)   | 1.1 [1.0,1.2]    | 1.5 [1.2,1.7]        | 1.0 [0.9,1.1]    |
| PVD                   | 789 (17.0)   | 1.6 [1.5,1.7]    | 1.9 [1.6,2.1]        | 1.5 [1.4,1.7]    |
| Systemic Embolism     | 153 (3.3)    | 0.3 [0.3,0.4]    | 0.6 [0.5,0.8]        | 0.2 [0.2,0.3]    |
| Pulmonary Embolism    | 978 (21.1)   | 2.0 [1.9,2.1]    | 6.4 [5.9,6.9]        | 0.9 [0.8,1.0]    |
| DVT                   | 1,180 (25.4) | 2.4 [2.3,2.5]    | 6.2 [5.7,6.7]        | 1.4 [1.3,1.5]    |
| Incident Users        | 2274 (49.0)  | 10.0 [9.6,10.4]  | 21.4 [20.2,22.6]     | 6.2 [5.8,6.7]    |
| Prevalent Users       | 2369 (51.0)  | 8.9 [8.5,9.2]    | 16.5 [15.3,17.7]     | 7.4 [7.0,7.8]    |
| Non-switchers         | 205 (4.4)    | 9.8 [8.5,11.1]   | 23.8 [18.3,29.4]     | 7.5 [6.2,8.7]    |
| Switchers             | 2164 (46.6)  | 8.8 [8.4,9.2]    | 16.0 [14.7,17.2]     | 7.4 [7.0,7.8]    |
| Male                  | 2193 (47.2)  | 10.0 [9.6,10.5]  | 21.4 [20.0,22.7]     | 7.1 [6.8,7.5]    |
| Female                | 2450 (53.8)  | 8.9 [8.5,9.2]    | 17.7 [16.6,18.8]     | 6.7 [6.3,7.0]    |

\* reported as number (%) and event rates as per 100 person-years (95% CI)

1  
2  
3 **Figure 1. Participant selection flowchart**  
4  
5  
6

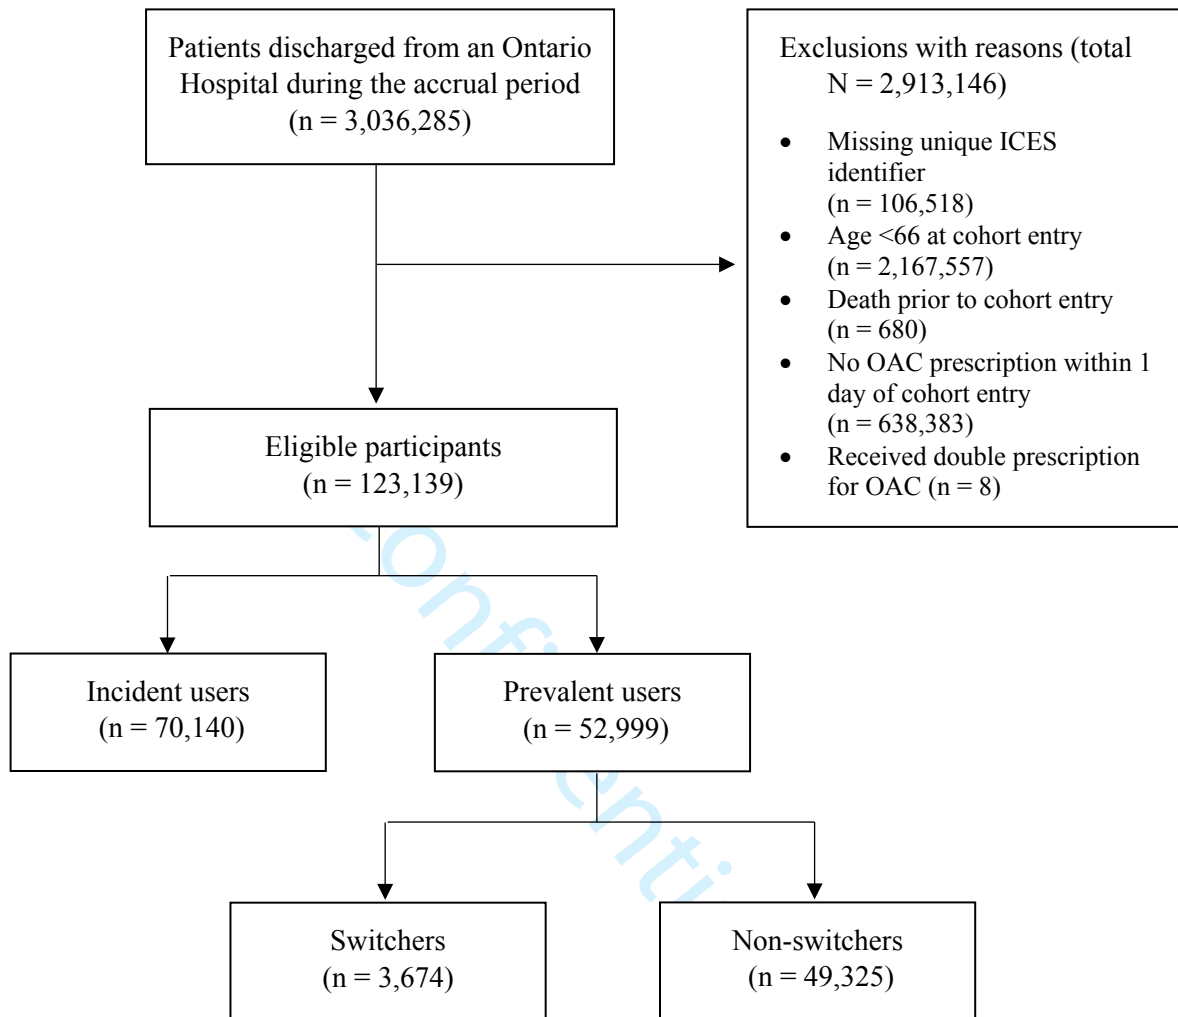

1  
2  
3  
4  
5  
6  
7  
8  
9  
10  
11  
12  
13  
14  
15  
16  
17  
18  
19  
20  
21  
22  
23  
24  
25  
26  
27  
28  
29  
30  
31  
32  
33  
34  
35  
36  
37  
38  
39  
40  
41  
42  
43  
44  
45  
46  
47  
48  
49  
50  
51  
52  
53  
54  
55  
56  
57  
58  
59  
60

**Figure 2. Cohort Timelines and Definitions**

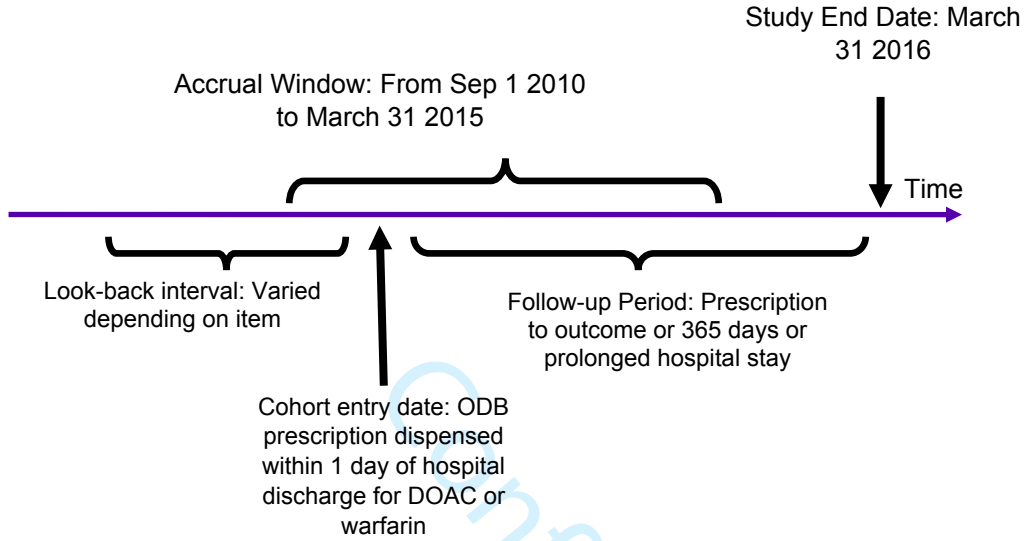

Confidential

Figure 3. Hemorrhage Event Rates Post-Hospital Discharge

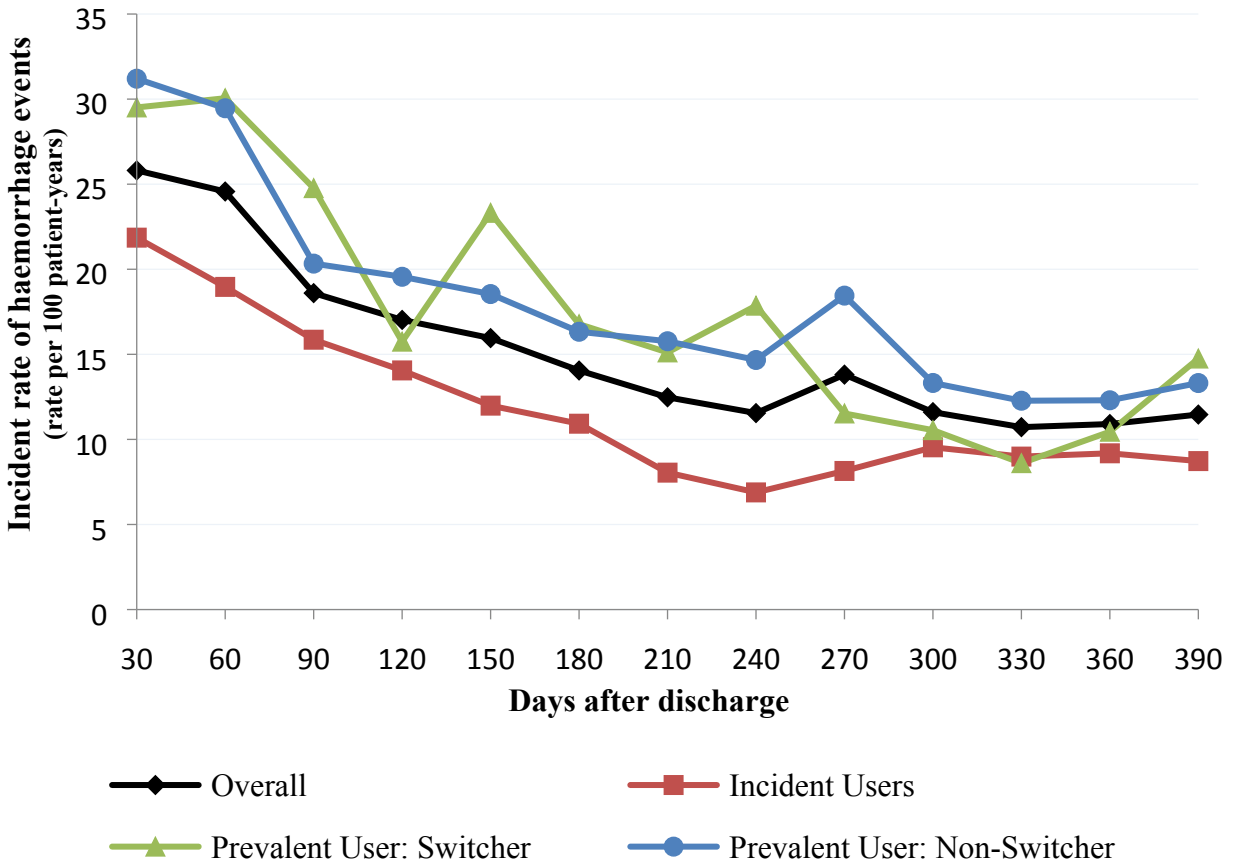

1  
2  
3  
4  
5  
6  
7  
8  
9  
10  
11  
12  
13  
14  
15  
16  
17  
18  
19  
20  
21  
22  
23  
24  
25  
26  
27  
28  
29  
30  
31  
32  
33  
34  
35  
36  
37  
38  
39  
40  
41  
42  
43  
44  
45  
46  
47  
48  
49  
50  
51  
52  
53  
54  
55  
56  
57  
58  
59  
60

**Figure 4. Thromboembolic Event Rates Post-Hospital Discharge**

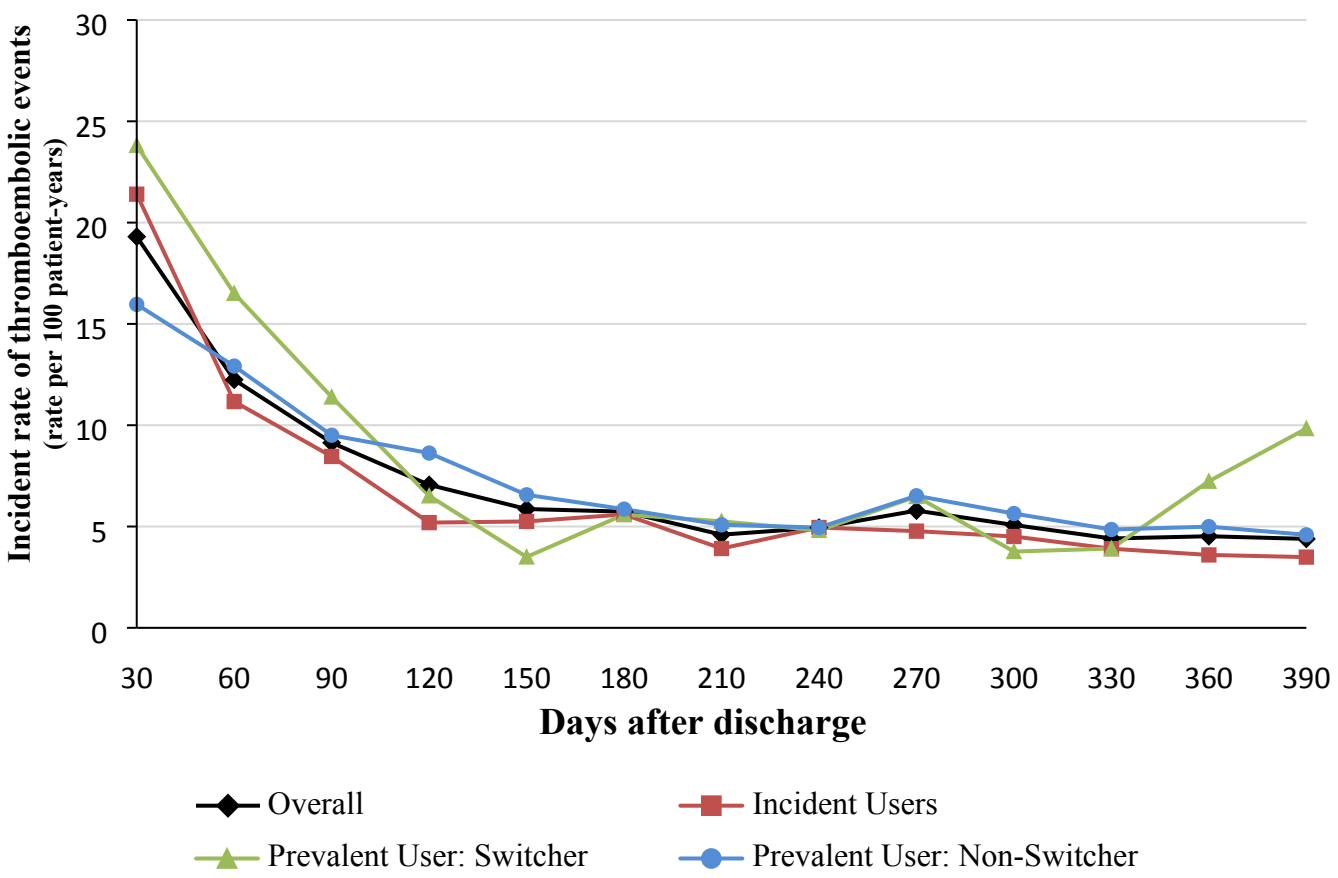



## References:

1. Cohen AT, Hamilton M, Mitchell SA, Phatak H, Liu X, Bird A, et al. Comparison of the Novel Oral Anticoagulants Apixaban, Dabigatran, Edoxaban, and Rivaroxaban in the Initial and Long-Term Treatment and Prevention of Venous Thromboembolism: Systematic Review and Network Meta-Analysis. *PloS one*. 2015;10(12):e0144856.
2. Kearon C, Akl EA, Ornelas J, Blaivas A, Jimenez D, Bounameaux H, et al. Antithrombotic Therapy for VTE Disease: CHEST Guideline and Expert Panel Report. *Chest*. 2016;149(2):315-52.
3. Macle L, Cairns J, Leblanc K, Tsang T, Skanes A, Cox JL, et al. 2016 Focused Update of the Canadian Cardiovascular Society Guidelines for the Management of Atrial Fibrillation. *The Canadian journal of cardiology*. 2016;32(10):1170-85.
4. Ruff CT, Giugliano RP, Braunwald E, Hoffman EB, Deenadayalu N, Ezekowitz MD, et al. Comparison of the efficacy and safety of new oral anticoagulants with warfarin in patients with atrial fibrillation: a meta-analysis of randomised trials. *Lancet (London, England)*. 2014;383(9921):955-62.
5. Wells G, Coyle D, Cameron C, Steiner S, Coyle K, Kelly S, et al. CADTH Therapeutic Reviews. Safety, Effectiveness, and Cost-Effectiveness of New Oral Anticoagulants Compared with Warfarin in Preventing Stroke and Other Cardiovascular Events in Patients with Atrial Fibrillation. Ottawa (ON): Canadian Agency for Drugs and Technologies in Health Effectiveness and Network Meta-Analysis.; 2012.
6. Kirley K, Qato Dima M, Kornfield R, Stafford Randall S, Alexander GC. National Trends in Oral Anticoagulant Use in the United States, 2007 to 2011. *Circulation: Cardiovascular Quality and Outcomes*. 2012;5(5):615-21.
7. Weitz JI, Semchuk W, Turpie AG, Fisher WD, Kong C, Ciaccia A, et al. Trends in Prescribing Oral Anticoagulants in Canada, 2008-2014. *Clinical therapeutics*. 2015;37(11):2506-14.e4.
8. ISMP. Medication Reconciliation in Acute Care. [www.patientsafetyinstitute.ca](http://www.patientsafetyinstitute.ca) Canadian Patient Safety Institute; 2017 [10 November 2017]. Available from: <https://www.ismp-canada.org/download/MedRec/MedRec-AcuteCare-GSK-EN.pdf>.
9. Bayoumi I, Dolovich L, Hutchison B, Holbrook A. Medication-related emergency department visits and hospitalizations among older adults. *Canadian family physician Medecin de famille canadien*. 2014;60(4):e217-22.
10. Budnitz DS, Lovegrove MC, Shehab N, Richards CL. Emergency Hospitalizations for Adverse Drug Events in Older Americans. *New England Journal of Medicine*. 2011;365(21):2002-12.
11. Patel TK, Patel PB. Mortality among patients due to adverse drug reactions that lead to hospitalization: a meta-analysis. *European journal of clinical pharmacology*. 2018;74(6):819-32.
12. Krumholz HM. Post-hospital syndrome--an acquired, transient condition of generalized risk. *The New England journal of medicine*. 2013;368(2):100-2.
13. Hanlon JT, Pieper CF, Hajjar ER, Sloane RJ, Lindblad CI, Ruby CM, et al. Incidence and predictors of all and preventable adverse drug reactions in frail elderly persons after hospital stay. *The journals of gerontology Series A, Biological sciences and medical sciences*. 2006;61(5):511-5.

14. Parekh N, Ali K, Stevenson JM, Davies JG, Schiff R, Van der Cammen T, et al. Incidence and cost of medication harm in older adults following hospital discharge: a multicentre prospective study in the UK. *British journal of clinical pharmacology*. 2018;84(8):1789-97.
15. Gomes T, Mamdani MM, Holbrook AM, Paterson JM, Hellings C, Juurlink DN. Rates of hemorrhage during warfarin therapy for atrial fibrillation. *CMAJ : Canadian Medical Association journal = journal de l'Association medicale canadienne*. 2013;185(2):E121-7.
16. Langan SM, Schmidt SA, Wing K, Ehrenstein V, Nicholls SG, Filion KB, et al. The reporting of studies conducted using observational routinely collected health data statement for pharmacoepidemiology (RECORD-PE). *BMJ*. 2018;363:k3532.
17. von Elm E AD, Egger M, Pocock SJ, Gotsche PC, Vandembroucke JP. The Strengthening the Reporting of Observational Studies in Epidemiology (STROBE) Statement: guidelines for reporting observational studies.
18. ICES. ICES Data [cited 2020 26 Jan]. Available from: <https://www.ices.on.ca/Data-and-Privacy/ICES-data>.
19. Schultz SE, Rothwell DM, Chen Z, Tu K. Identifying cases of congestive heart failure from administrative data: a validation study using primary care patient records. *Chronic diseases and injuries in Canada*. 2013;33(3):160-6.
20. Lipscombe LL, Hwee J, Webster L, Shah BR, Booth GL, Tu K. Identifying diabetes cases from administrative data: a population-based validation study. *BMC Health Services Research*. 2018;18(1):316.
21. Quan H, Khan N, Hemmelgarn BR, Tu K, Chen G, Campbell N, et al. Validation of a case definition to define hypertension using administrative data. *Hypertension (Dallas, Tex : 1979)*. 2009;54(6):1423-8.
22. Cancer Care Ontario (CCO). How We Collect Cancer Registry Data [cited 2020 26 Jan]. Available from: <https://www.cancercareontario.ca/en/data-research/accessing-data/technical-information/cancer-registry-data-collection>.
23. Fleet JL, McArthur E, Patel A, Weir MA, Montero-Odasso M, Garg AX. Risk of rhabdomyolysis with donepezil compared with rivastigmine or galantamine: a population-based cohort study. *Canadian Medical Association Journal*. 2019;191(37):E1018-E24.
24. Tamariz L, Harkins T, Nair V. A systematic review of validated methods for identifying venous thromboembolism using administrative and claims data. *Pharmacoepidemiology and drug safety*. 2012;21 Suppl 1:154-62.
25. Sanfilippo KM, Wang TF, Gage BF, Liu W, Carson KR. Improving accuracy of International Classification of Diseases codes for venous thromboembolism in administrative data. *Thrombosis research*. 2015;135(4):616-20.
26. Arnason T, Wells PS, van Walraven C, Forster AJ. Accuracy of coding for possible warfarin complications in hospital discharge abstracts. *Thrombosis research*. 2006;118(2):253-62.
27. White RH, Garcia M, Sadeghi B, Tancredi DJ, Zrelak P, Cuny J, et al. Evaluation of the predictive value of ICD-9-CM coded administrative data for venous thromboembolism in the United States. *Thrombosis research*. 2010;126(1):61-7.
28. Austin PC, Daly PA, Tu JV. A multicenter study of the coding accuracy of hospital discharge administrative data for patients admitted to cardiac care units in Ontario. *American heart journal*. 2002;144(2):290-6.
29. Tu K, Mitiku T, Guo H, Lee DS, Tu JV. Myocardial infarction and the validation of physician billing and hospitalization data using electronic medical records. *Chronic diseases in Canada*. 2010;30(4):141-6.

- 1
  - 2
  - 3
  - 4
  - 5
  - 6
  - 7
  - 8
  - 9
  - 10
  - 11
  - 12
  - 13
  - 14
  - 15
  - 16
  - 17
  - 18
  - 19
  - 20
  - 21
  - 22
  - 23
  - 24
  - 25
  - 26
  - 27
  - 28
  - 29
  - 30
  - 31
  - 32
  - 33
  - 34
  - 35
  - 36
  - 37
  - 38
  - 39
  - 40
  - 41
  - 42
  - 43
  - 44
  - 45
  - 46
  - 47
  - 48
  - 49
  - 50
  - 51
  - 52
  - 53
  - 54
  - 55
  - 56
  - 57
  - 58
  - 59
  - 60
30. Alotaibi GS, Wu C, Senthilselvan A, McMurtry MS. The validity of ICD codes coupled with imaging procedure codes for identifying acute venous thromboembolism using administrative data. *Vascular medicine (London, England)*. 2015;20(4):364-8.
31. Deyo RA, Cherkin DC, Ciol MA. Adapting a clinical comorbidity index for use with ICD-9-CM administrative databases. *Journal of clinical epidemiology*. 1992;45(6):613-9.
32. Hux JE, Ivis F, Flintoft V, Bica A. Diabetes in Ontario: determination of prevalence and incidence using a validated administrative data algorithm. *Diabetes care*. 2002;25(3):512-6.
33. Lip GY, Nieuwlaat R, Pisters R, Lane DA, Crijns HJ. Refining clinical risk stratification for predicting stroke and thromboembolism in atrial fibrillation using a novel risk factor-based approach: the euro heart survey on atrial fibrillation. *Chest*. 2010;137(2):263-72.
34. Pisters R, Lane DA, Nieuwlaat R, de Vos CB, Crijns HJ, Lip GY. A novel user-friendly score (HAS-BLED) to assess 1-year risk of major bleeding in patients with atrial fibrillation: the Euro Heart Survey. *Chest*. 2010;138(5):1093-100.
35. Tu K, Campbell NR, Chen Z-L, Cauch-Dudek KJ, McAlister FA. Accuracy of administrative databases in identifying patients with hypertension. *Open Med*. 2007;1(1):e18-e26.
36. Stukel TA, Austin PC, Azimae M, Bronskill SE, Guttman A, Paterson JM, Schull MJ, Sutradhar R, Victor JC. Envisioning a Data Science Strategy for ICES. Toronto, ON: Institute for Clinical Evaluative Sciences; 2017.
37. Giardina C, Cutroneo PM, Mocciano E, Russo GT, Mandraffino G, Basile G, et al. Adverse Drug Reactions in Hospitalized Patients: Results of the FORWARD (Facilitation of Reporting in Hospital Ward) Study. *Front Pharmacol*. 2018;9:350-.
38. Kanaan AO, Donovan JL, Duchin NP, Field TS, Tjia J, Cutrona SL, et al. Adverse drug events after hospital discharge in older adults: types, severity, and involvement of Beers Criteria Medications. *Journal of the American Geriatrics Society*. 2013;61(11):1894-9.
39. Leppin AL, Gionfriddo MR, Kessler M, Brito JP, Mair FS, Gallacher K, et al. Preventing 30-day hospital readmissions: a systematic review and meta-analysis of randomized trials. *JAMA internal medicine*. 2014;174(7):1095-107.
40. van Walraven C, Mamdani M, Fang J, Austin PC. Continuity of care and patient outcomes after hospital discharge. *J Gen Intern Med*. 2004;19(6):624-31.
41. Keenan CR, White RH. The effects of race/ethnicity and sex on the risk of venous thromboembolism. *Current opinion in pulmonary medicine*. 2007;13(5):377-83.
42. McRae S, Tran H, Schulman S, Ginsberg J, Kearon C. Effect of patient's sex on risk of recurrent venous thromboembolism: a meta-analysis. *Lancet (London, England)*. 2006;368(9533):371-8.
43. Roach REJ, Cannegieter SC, Lijfering WM. Differential risks in men and women for first and recurrent venous thrombosis: the role of genes and environment. *Journal of Thrombosis and Haemostasis*. 2014;12(10):1593-600.
44. Raccach BH, Perlman A, Zwas DR, Hochberg-Klein S, Masarwa R, Muszkat M, et al. Gender Differences in Efficacy and Safety of Direct Oral Anticoagulants in Atrial Fibrillation: Systematic Review and Network Meta-analysis. *The Annals of pharmacotherapy*. 2018;52(11):1135-42.
45. Penttilä T, Lehto M, Niiranen J, Mehtälä J, Khanfir H, Lassila R, et al. Differences in the risk of stroke, bleeding events, and mortality between female and male patients with atrial fibrillation during warfarin therapy. *Eur Heart J Cardiovasc Pharmacother*. 2019;5(1):29-36.
46. Renoux C, Coulombe J, Suissa S. Revisiting sex differences in outcomes in non-valvular atrial fibrillation: a population-based cohort study. *European heart journal*. 2017;38(19):1473-9.

- 1  
2  
3 47. Lapner S, Cohen N, Kearon C. Influence of sex on risk of bleeding in anticoagulated  
4 patients: a systematic review and meta-analysis. *Journal of thrombosis and haemostasis* : JTH.  
5 2014;12(5):595-605.  
6  
7 48. Boyko EJ. Observational research--opportunities and limitations. *Journal of diabetes and*  
8 *its complications*. 2013;27(6):642-8.  
9 49. Juurlink D PC, Croxford R, Chong A, Austin P, Tu J, Laupacis A. Canadian Institute for  
10 Health Information Discharge Abstract Database: A Validation Study: Institute for Clinical  
11 Evaluative Sciences; 2006 [Available from: [https://www.ices.on.ca/flip-publication/canadian-](https://www.ices.on.ca/flip-publication/canadian-istitute-for-health-information-discharge/files/assets/basic-html/index.html#1)  
12 [istitute-for-health-information-discharge/files/assets/basic-html/index.html#1](https://www.ices.on.ca/flip-publication/canadian-istitute-for-health-information-discharge/files/assets/basic-html/index.html#1).  
13  
14 50. Levy AR, O'Brien BJ, Sellors C, Grootendorst P, Willison D. Coding accuracy of  
15 administrative drug claims in the Ontario Drug Benefit database. *The Canadian journal of clinical*  
16 *pharmacology = Journal canadien de pharmacologie clinique*. 2003;10(2):67-71.  
17 51. Williams JI YW. A Summary of Studies on the Quality of Health Care Administrative  
18 Databases in Canada. In: In Goel V WJ, Anderson GM, Blackstien-Hirsch P, Fooks C, Naylor CD  
19 editor. *Patterns of Health Care in Ontario, The ICES Practice Atlas*. Second ed. Ottawa: Canadian  
20 Medical Association; 1996. p. 339-45.  
21  
22  
23  
24  
25  
26  
27  
28  
29  
30  
31  
32  
33  
34  
35  
36  
37  
38  
39  
40  
41  
42  
43  
44  
45  
46  
47  
48  
49  
50  
51  
52  
53  
54  
55  
56  
57  
58  
59  
60

# Reporting checklist for *OAC Post-discharge Events*. Holbrook et al.

Based on the STROBE cohort guidelines.

## Instructions to authors

Complete this checklist by entering the page numbers from your manuscript where readers will find each of the items listed below.

Your article may not currently address all the items on the checklist. Please modify your text to include the missing information. If you are certain that an item does not apply, please write "n/a" and provide a short explanation.

Upload your completed checklist as an extra file when you submit to a journal.

In your methods section, say that you used the STROBE cohort reporting guidelines, and cite them as:

*von Elm E, Altman DG, Egger M, Pocock SJ, Gøtzsche PC, Vandenbroucke JP. The Strengthening the Reporting of Observational Studies in Epidemiology (STROBE) Statement: guidelines for reporting observational studies.*

|                           | Reporting Item                                                                                                      | Page Number |
|---------------------------|---------------------------------------------------------------------------------------------------------------------|-------------|
| <b>Title and abstract</b> |                                                                                                                     |             |
| Title                     | <a href="#">#1a</a> Indicate the study's design with a commonly used term in the title or the abstract              | 1           |
| Abstract                  | <a href="#">#1b</a> Provide in the abstract an informative and balanced summary of what was done and what was found | 2           |
| <b>Introduction</b>       |                                                                                                                     |             |
| Background / rationale    | <a href="#">#2</a> Explain the scientific background and rationale for the investigation being reported             | 3           |
| Objectives                | <a href="#">#3</a> State specific objectives, including any prespecified hypotheses                                 | 3           |

|    |                      |                     |                                                      |                    |
|----|----------------------|---------------------|------------------------------------------------------|--------------------|
| 1  | <b>Methods</b>       |                     |                                                      |                    |
| 2  |                      |                     |                                                      |                    |
| 3  |                      |                     |                                                      |                    |
| 4  | Study design         | <a href="#">#4</a>  | Present key elements of study design early in the    | 3-4                |
| 5  |                      |                     | paper                                                |                    |
| 6  |                      |                     |                                                      |                    |
| 7  |                      |                     |                                                      |                    |
| 8  |                      |                     |                                                      |                    |
| 9  |                      |                     |                                                      |                    |
| 10 | Setting              | <a href="#">#5</a>  | Describe the setting, locations, and relevant dates, | 4                  |
| 11 |                      |                     | including periods of recruitment, exposure, follow-  |                    |
| 12 |                      |                     | up, and data collection                              |                    |
| 13 |                      |                     |                                                      |                    |
| 14 |                      |                     |                                                      |                    |
| 15 |                      |                     |                                                      |                    |
| 16 |                      |                     |                                                      |                    |
| 17 | Eligibility criteria | <a href="#">#6a</a> | Give the eligibility criteria, and the sources and   | 4                  |
| 18 |                      |                     | methods of selection of participants. Describe       |                    |
| 19 |                      |                     | methods of follow-up.                                |                    |
| 20 |                      |                     |                                                      |                    |
| 21 |                      |                     |                                                      |                    |
| 22 |                      |                     |                                                      |                    |
| 23 |                      |                     |                                                      |                    |
| 24 |                      |                     |                                                      |                    |
| 25 | Eligibility criteria | <a href="#">#6b</a> | For matched studies, give matching criteria and      | N/A – this is a    |
| 26 |                      |                     | number of exposed and unexposed                      | single arm cohort  |
| 27 |                      |                     |                                                      |                    |
| 28 |                      |                     |                                                      |                    |
| 29 |                      |                     |                                                      |                    |
| 30 | Variables            | <a href="#">#7</a>  | Clearly define all outcomes, exposures, predictors,  | 4-5                |
| 31 |                      |                     | potential confounders, and effect modifiers. Give    |                    |
| 32 |                      |                     | diagnostic criteria, if applicable                   |                    |
| 33 |                      |                     |                                                      |                    |
| 34 |                      |                     |                                                      |                    |
| 35 |                      |                     |                                                      |                    |
| 36 |                      |                     |                                                      |                    |
| 37 |                      |                     |                                                      |                    |
| 38 | Data sources /       | <a href="#">#8</a>  | For each variable of interest give sources of data   | 5                  |
| 39 | measurement          |                     | and details of methods of assessment                 |                    |
| 40 |                      |                     | (measurement). Describe comparability of             |                    |
| 41 |                      |                     | assessment methods if there is more than one         |                    |
| 42 |                      |                     | group. Give information separately for for exposed   |                    |
| 43 |                      |                     | and unexposed groups if applicable.                  |                    |
| 44 |                      |                     |                                                      |                    |
| 45 |                      |                     |                                                      |                    |
| 46 |                      |                     |                                                      |                    |
| 47 |                      |                     |                                                      |                    |
| 48 |                      |                     |                                                      |                    |
| 49 |                      |                     |                                                      |                    |
| 50 |                      |                     |                                                      |                    |
| 51 |                      |                     |                                                      |                    |
| 52 | Bias                 | <a href="#">#9</a>  | Describe any efforts to address potential sources    | 4 (attempts to     |
| 53 |                      |                     | of bias                                              | minimize selection |
| 54 |                      |                     |                                                      |                    |
| 55 |                      |                     |                                                      |                    |
| 56 |                      |                     |                                                      |                    |
| 57 |                      |                     |                                                      |                    |
| 58 |                      |                     |                                                      |                    |
| 59 |                      |                     |                                                      |                    |
| 60 |                      |                     |                                                      |                    |

|    |              |                      |                                                    |                     |
|----|--------------|----------------------|----------------------------------------------------|---------------------|
| 1  |              |                      |                                                    | bias, missing data  |
| 2  |              |                      |                                                    |                     |
| 3  |              |                      |                                                    | bias                |
| 4  |              |                      |                                                    |                     |
| 5  |              |                      |                                                    |                     |
| 6  | Study size   | <a href="#">#10</a>  | Explain how the study size was arrived at          | 6                   |
| 7  |              |                      |                                                    |                     |
| 8  |              |                      |                                                    |                     |
| 9  | Quantitative | <a href="#">#11</a>  | Explain how quantitative variables were handled in | 5                   |
| 10 |              |                      |                                                    |                     |
| 11 | variables    |                      | the analyses. If applicable, describe which        |                     |
| 12 |              |                      |                                                    |                     |
| 13 |              |                      | groupings were chosen, and why                     |                     |
| 14 |              |                      |                                                    |                     |
| 15 |              |                      |                                                    |                     |
| 16 | Statistical  | <a href="#">#12a</a> | Describe all statistical methods, including those  | 5                   |
| 17 |              |                      |                                                    |                     |
| 18 | methods      |                      | used to control for confounding                    |                     |
| 19 |              |                      |                                                    |                     |
| 20 |              |                      |                                                    |                     |
| 21 |              |                      |                                                    |                     |
| 22 | Statistical  | <a href="#">#12b</a> | Describe any methods used to examine subgroups     | 5                   |
| 23 |              |                      |                                                    |                     |
| 24 | methods      |                      | and interactions                                   |                     |
| 25 |              |                      |                                                    |                     |
| 26 |              |                      |                                                    |                     |
| 27 | Statistical  | <a href="#">#12c</a> | Explain how missing data were addressed            | 6                   |
| 28 |              |                      |                                                    |                     |
| 29 | methods      |                      |                                                    |                     |
| 30 |              |                      |                                                    |                     |
| 31 |              |                      |                                                    |                     |
| 32 | Statistical  | <a href="#">#12d</a> | If applicable, explain how loss to follow-up was   | 5 – multiple        |
| 33 |              |                      |                                                    |                     |
| 34 | methods      |                      | addressed                                          | categories for      |
| 35 |              |                      |                                                    | follow-up reported  |
| 36 |              |                      |                                                    | including vital     |
| 37 |              |                      |                                                    | status              |
| 38 |              |                      |                                                    |                     |
| 39 |              |                      |                                                    |                     |
| 40 |              |                      |                                                    |                     |
| 41 |              |                      |                                                    |                     |
| 42 |              |                      |                                                    |                     |
| 43 |              |                      |                                                    |                     |
| 44 | Statistical  | <a href="#">#12e</a> | Describe any sensitivity analyses                  | 5 – our statistical |
| 45 |              |                      |                                                    |                     |
| 46 | methods      |                      |                                                    | analyses include    |
| 47 |              |                      |                                                    | different key       |
| 48 |              |                      |                                                    | subgroups and       |
| 49 |              |                      |                                                    | their event rate.   |
| 50 |              |                      |                                                    |                     |
| 51 |              |                      |                                                    |                     |
| 52 |              |                      |                                                    |                     |
| 53 |              |                      |                                                    |                     |
| 54 |              |                      |                                                    |                     |
| 55 |              |                      |                                                    |                     |
| 56 |              |                      |                                                    |                     |
| 57 |              |                      |                                                    |                     |
| 58 |              |                      |                                                    |                     |
| 59 |              |                      |                                                    |                     |
| 60 |              |                      |                                                    |                     |

This is a type of  
sensitivity analysis

## Results

|    |                  |                                                                        |       |
|----|------------------|------------------------------------------------------------------------|-------|
| 1  |                  |                                                                        |       |
| 2  |                  |                                                                        |       |
| 3  |                  |                                                                        |       |
| 4  |                  |                                                                        |       |
| 5  |                  |                                                                        |       |
| 6  | <b>Results</b>   |                                                                        |       |
| 7  |                  |                                                                        |       |
| 8  |                  |                                                                        |       |
| 9  | Participants     | <a href="#">#13a</a> Report numbers of individuals at each stage of    | 6     |
| 10 |                  |                                                                        |       |
| 11 |                  | study—eg numbers potentially eligible, examined                        |       |
| 12 |                  |                                                                        |       |
| 13 |                  | for eligibility, confirmed eligible, included in the                   |       |
| 14 |                  |                                                                        |       |
| 15 |                  | study, completing follow-up, and analysed. Give                        |       |
| 16 |                  |                                                                        |       |
| 17 |                  | information separately for for exposed and                             |       |
| 18 |                  |                                                                        |       |
| 19 |                  | unexposed groups if applicable.                                        |       |
| 20 |                  |                                                                        |       |
| 21 |                  |                                                                        |       |
| 22 |                  |                                                                        |       |
| 23 | Participants     | <a href="#">#13b</a> Give reasons for non-participation at each stage  | 13    |
| 24 |                  |                                                                        |       |
| 25 |                  |                                                                        |       |
| 26 | Participants     | <a href="#">#13c</a> Consider use of a flow diagram                    | 13    |
| 27 |                  |                                                                        |       |
| 28 |                  |                                                                        |       |
| 29 | Descriptive data | <a href="#">#14a</a> Give characteristics of study participants (eg    | 10-11 |
| 30 |                  |                                                                        |       |
| 31 |                  | demographic, clinical, social) and information on                      |       |
| 32 |                  |                                                                        |       |
| 33 |                  | exposures and potential confounders. Give                              |       |
| 34 |                  |                                                                        |       |
| 35 |                  | information separately for exposed and unexposed                       |       |
| 36 |                  |                                                                        |       |
| 37 |                  | groups if applicable.                                                  |       |
| 38 |                  |                                                                        |       |
| 39 |                  |                                                                        |       |
| 40 |                  |                                                                        |       |
| 41 | Descriptive data | <a href="#">#14b</a> Indicate number of participants with missing data | 10-11 |
| 42 |                  |                                                                        |       |
| 43 |                  | for each variable of interest                                          |       |
| 44 |                  |                                                                        |       |
| 45 |                  |                                                                        |       |
| 46 |                  |                                                                        |       |
| 47 | Descriptive data | <a href="#">#14c</a> Summarise follow-up time (eg, average and total   | 14    |
| 48 |                  |                                                                        |       |
| 49 |                  | amount)                                                                |       |
| 50 |                  |                                                                        |       |
| 51 |                  |                                                                        |       |
| 52 |                  |                                                                        |       |
| 53 |                  |                                                                        |       |
| 54 |                  |                                                                        |       |
| 55 |                  |                                                                        |       |
| 56 |                  |                                                                        |       |
| 57 |                  |                                                                        |       |
| 58 |                  |                                                                        |       |
| 59 |                  |                                                                        |       |
| 60 |                  |                                                                        |       |



|    |                   |                      |                                                        |                   |
|----|-------------------|----------------------|--------------------------------------------------------|-------------------|
| 1  | Outcome data      | <a href="#">#15</a>  | Report numbers of outcome events or summary            | 12                |
| 2  |                   |                      | measures over time. Give information separately        |                   |
| 3  |                   |                      | for exposed and unexposed groups if applicable.        |                   |
| 4  |                   |                      |                                                        |                   |
| 5  |                   |                      |                                                        |                   |
| 6  |                   |                      |                                                        |                   |
| 7  |                   |                      |                                                        |                   |
| 8  |                   |                      |                                                        |                   |
| 9  | Main results      | <a href="#">#16a</a> | Give unadjusted estimates and, if applicable,          | N/A – descriptive |
| 10 |                   |                      | confounder-adjusted estimates and their precision      | analysis          |
| 11 |                   |                      | (eg, 95% confidence interval). Make clear which        |                   |
| 12 |                   |                      | confounders were adjusted for and why they were        |                   |
| 13 |                   |                      | included                                               |                   |
| 14 |                   |                      |                                                        |                   |
| 15 |                   |                      |                                                        |                   |
| 16 |                   |                      |                                                        |                   |
| 17 |                   |                      |                                                        |                   |
| 18 |                   |                      |                                                        |                   |
| 19 |                   |                      |                                                        |                   |
| 20 |                   |                      |                                                        |                   |
| 21 | Main results      | <a href="#">#16b</a> | Report category boundaries when continuous             | 7                 |
| 22 |                   |                      | variables were categorized                             |                   |
| 23 |                   |                      |                                                        |                   |
| 24 |                   |                      |                                                        |                   |
| 25 |                   |                      |                                                        |                   |
| 26 | Main results      | <a href="#">#16c</a> | If relevant, consider translating estimates of         | 7                 |
| 27 |                   |                      | relative risk into absolute risk for a meaningful time |                   |
| 28 |                   |                      | period                                                 |                   |
| 29 |                   |                      |                                                        |                   |
| 30 |                   |                      |                                                        |                   |
| 31 |                   |                      |                                                        |                   |
| 32 |                   |                      |                                                        |                   |
| 33 |                   |                      |                                                        |                   |
| 34 | Other analyses    | <a href="#">#17</a>  | Report other analyses done—e.g., analyses of           | 7                 |
| 35 |                   |                      | subgroups and interactions, and sensitivity            |                   |
| 36 |                   |                      | analyses                                               |                   |
| 37 |                   |                      |                                                        |                   |
| 38 |                   |                      |                                                        |                   |
| 39 |                   |                      |                                                        |                   |
| 40 |                   |                      |                                                        |                   |
| 41 |                   |                      |                                                        |                   |
| 42 | <b>Discussion</b> |                      |                                                        |                   |
| 43 |                   |                      |                                                        |                   |
| 44 |                   |                      |                                                        |                   |
| 45 | Key results       | <a href="#">#18</a>  | Summarise key results with reference to study          | 7                 |
| 46 |                   |                      | objectives                                             |                   |
| 47 |                   |                      |                                                        |                   |
| 48 |                   |                      |                                                        |                   |
| 49 |                   |                      |                                                        |                   |
| 50 | Limitations       | <a href="#">#19</a>  | Discuss limitations of the study, taking into account  | 7                 |
| 51 |                   |                      | sources of potential bias or imprecision. Discuss      |                   |
| 52 |                   |                      | both direction and magnitude of any potential bias.    |                   |
| 53 |                   |                      |                                                        |                   |
| 54 |                   |                      |                                                        |                   |
| 55 |                   |                      |                                                        |                   |
| 56 |                   |                      |                                                        |                   |
| 57 |                   |                      |                                                        |                   |
| 58 |                   |                      |                                                        |                   |
| 59 |                   |                      |                                                        |                   |
| 60 |                   |                      |                                                        |                   |

1 Interpretation [#20](#) Give a cautious overall interpretation considering 8  
2  
3 objectives, limitations, multiplicity of analyses,  
4  
5 results from similar studies, and other relevant  
6  
7 evidence.  
8  
9

10  
11 Generalisability [#21](#) Discuss the generalisability (external validity) of 7  
12  
13 the study results  
14  
15

## 16 Other Information

17  
18  
19 Funding [#22](#) Give the source of funding and the role of the 8  
20  
21 funders for the present study and, if applicable, for  
22  
23 the original study on which the present article is  
24  
25 based  
26  
27  
28

29  
30 None The STROBE checklist is distributed under the terms of the Creative Commons Attribution  
31  
32 License CC-BY. This checklist can be completed online using <https://www.goodreports.org/>, a tool  
33  
34 made by the [EQUATOR Network](#) in collaboration with [Penelope.ai](#)  
35  
36  
37  
38  
39  
40  
41  
42  
43  
44  
45  
46  
47  
48  
49  
50  
51  
52  
53  
54  
55  
56  
57  
58  
59  
60
